# Supplementary material for: Allosteric Activation of 15‐Lipoxygenase‐1 by Boswellic Acid Induces the Lipid Mediator Class Switch to Promote Resolution of Inflammation
Source: PubMed Central journal article supplement (PMC9951388; doi:10.1002/advs.202205604), 2022-12-25
Supplement: ADVS-10-2205604-s001.pdf [file ADVS-10-2205604-s001.pdf]

## Supporting Information

**Allosteric activation of 15-lipoxygenase-1 by boswellic acid induces the lipid mediator class switch to promote resolution of inflammation**

*Friedemann Börner, Simona Pace, Paul M. Jordan, Jana Gerstmeier, Mario Gomez, Antonietta Rossi, Nathaniel C. Gilbert, Marcia E. Newcomer, Oliver Werz\**

**Contents:**

Figure S1. Effects of AKBA on cell viability of human M2-MDMs.

Figure S2. Effects of boswellic acids on the cell viability, AA release, and 15-LOX-1 subcellular distribution in human MDMs.

Figure S3. Protein expression of 5-LOX and 15-LOX-2 in ALOX15A siRNA-treated M2-MDMs.

Figure S4. Effects of boswellic acids on  $[Ca^{2+}]_i$  in M1-MDMs.

Figure S5. Effect of AKBA on protein kinase activation and on LM-biosynthetic enzyme expression.

Figure S6. Expression of wt- and R98A-mutant-15-LOX-1 in HEK293 cells at the protein level.

Table S1. Modulation of lipid mediator formation in activated 5-LOX-expressing immune cells by AKBA.

Table S2. Induction of lipid mediator formation in unstimulated 5-LOX-expressing immune cells by AKBA.

Table S3. Effect of AKBA after 15-LOX-1 knockdown in M2 macrophages

Table S4. Effect of AKBA on M2-MDMs after DHA/EPA supplementation.

Table S5. 15-LOX-1 activation by AKBA in M2-MDMs is insensitive to  $Ca^{2+}$ .

Table S6. Effects of kinase inhibitors on AKBA-induced LM formation in M2-MDM.

Table S7. Effects of AKBA on LM formation in LOX-transfected HEK293 cells.

Table S8. Effects of AKBA on mutated 15-LOX-1 (R98A) in stable transfected HEK293 cells.

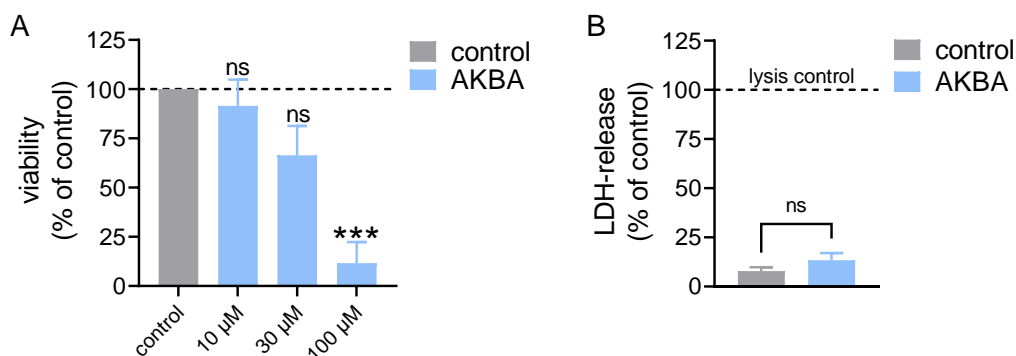

**Figure S1.** Effects of AKBA on cell viability of human M2-MDMs. (A) MTT cell viability assay of M2-MDMs.  $10^5$  cells were polarized for 48 h and treated with AKBA (as indicated) or vehicle (0.1% DMSO) for another 3 h at 37°C (5% CO<sub>2</sub>). After addition of MTT solution, cells were incubated for 2 h at 37°C and lysed in an SDS-containing buffer (10% w/v). Cell viability is represented by reduction of MTT and shown as percentage of vehicle control. For statistical analysis data was log transformed, unpaired Student's t-test, \*\*\*p < 0.001 for AKBA vs. control, n = 4 separate donors. (B) LDH release of M2-like MDMs after exposure to AKBA (10 μM) or vehicle. Triton X-100 was used as a positive control (max. LDH release) and percent cytotoxicity were calculated referred to manufacturer's guidelines; unpaired Student's t-test, n = 3 separate donors.

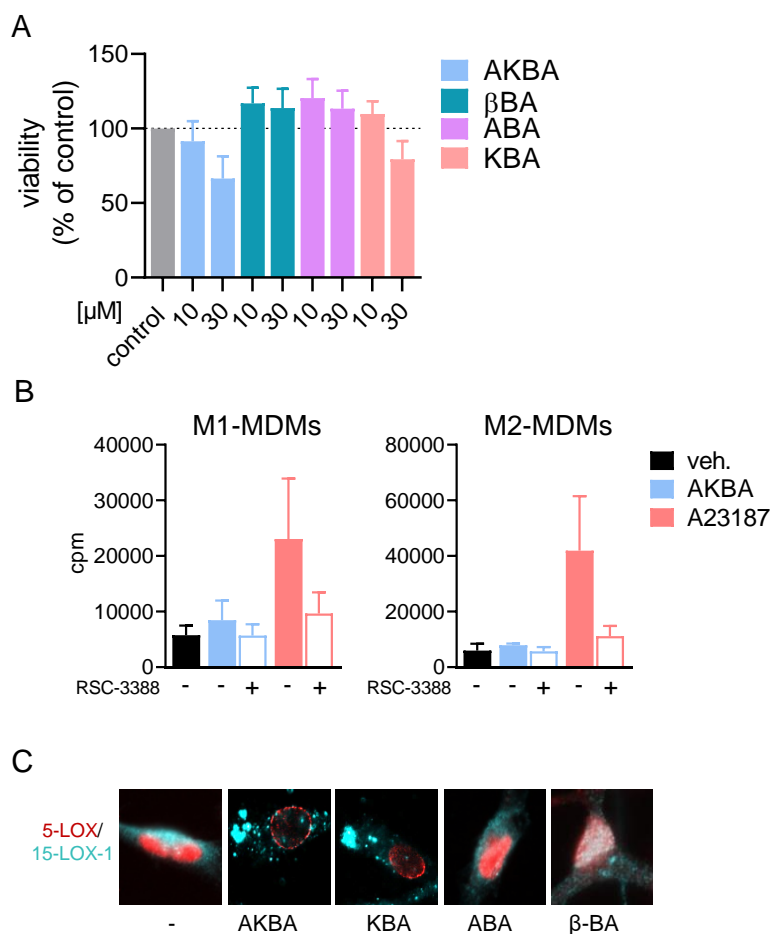

**Figure S2.** Effects of boswellic acids on the cell viability, AA release, and 15-LOX-1 subcellular distribution in human MDMs. (A) MTT cytotoxicity assay of human M2-like MDMs.  $10^5$  cells were treated with BAs (as indicated) or vehicle (0.1% DMSO) for 180 min at 37 °C. After addition of MTT solution cells were incubated for another 120 min at 37°C and lysed in a SDS containing buffer (10% w/v). Cell viability is shown as percentage of vehicle control;  $n = 3 - 4$  separate donors. (B) Release of [ $^3\text{H}$ ]-AA and its metabolite from [ $^3\text{H}$ ]-AA-prelabelled M1- and M2-MDM preincubated with 10  $\mu\text{M}$  RSC-3388 for 10 min and stimulated with A23187 (0.5  $\mu\text{M}$ ) or AKBA (10) for 10 and 90 min, each; results are given in cpm (counts per minute), means + S.E.M.;  $n = 3$ . (C) Subcellular redistribution of 5-LOX and 15-LOX-1 in M2-MDMs after exposure to with boswellic acids (BA, 10  $\mu\text{M}$  each) for 180 min. Cells were fixed, permeabilized, and incubated with antibodies against 5-LOX (red) and 15-LOX-1 (cyan-blue); scale bars = 10  $\mu\text{m}$ . Results shown for one single cell are representative for approx. 100 individual cells analysed,  $n = 3$  independent experiments.

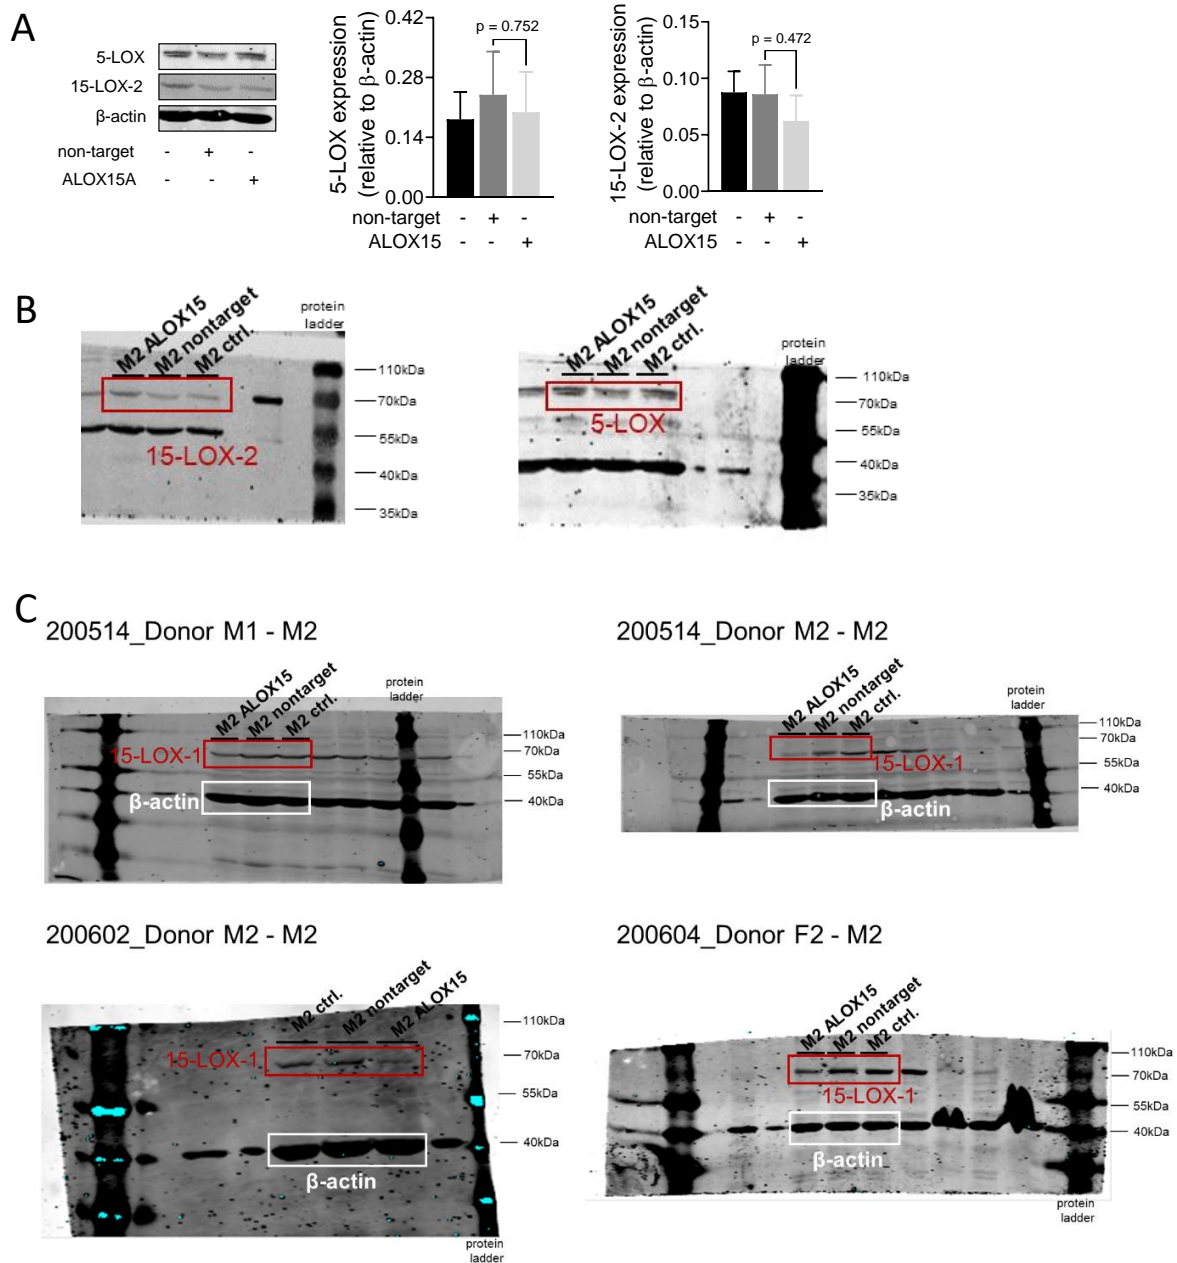

**Figure S3.** Protein expression of 5-LOX and 15-LOX-2 in ALOX15A siRNA-treated M2-MDMs. (A) Representative Western blot of untreated, non-target or ALOX15 siRNA-transfected M2-MDMs and corresponding densitometric analysis of 5-LOX and 15-LOX-2 protein amounts;  $n = 4$  independent experiments. (B) Single, uncropped Western Blots for 5-LOX and 15-LOX-2 expression; related to Figure S3A. (C) Single, uncropped Western Blots from four independent experiments for 15-LOX-1 expression; related to Figure 3A.

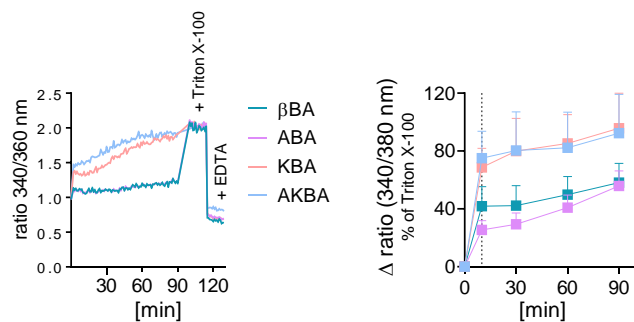

**Figure S4.** Effects of boswellic acids on  $[Ca^{2+}]_i$  in M1-MDMs. Analysis of  $[Ca^{2+}]_i$  in Fura-2/AM-loaded M1-MDMs in Krebs-Hepes buffer containing 1 mM  $Ca^{2+}$  after stimulation with BAs or vehicle for up to 90 min. Representative line plots are shown as ratio of absorbance at 340/380 nm (left panel) and  $[Ca^{2+}]_i$  is given as ratio of 340/380 nm in % of maximum  $[Ca^{2+}]_i$  determined by cell lysis with triton X-100 (right panel);  $n = 4 - 5$  separate donors.

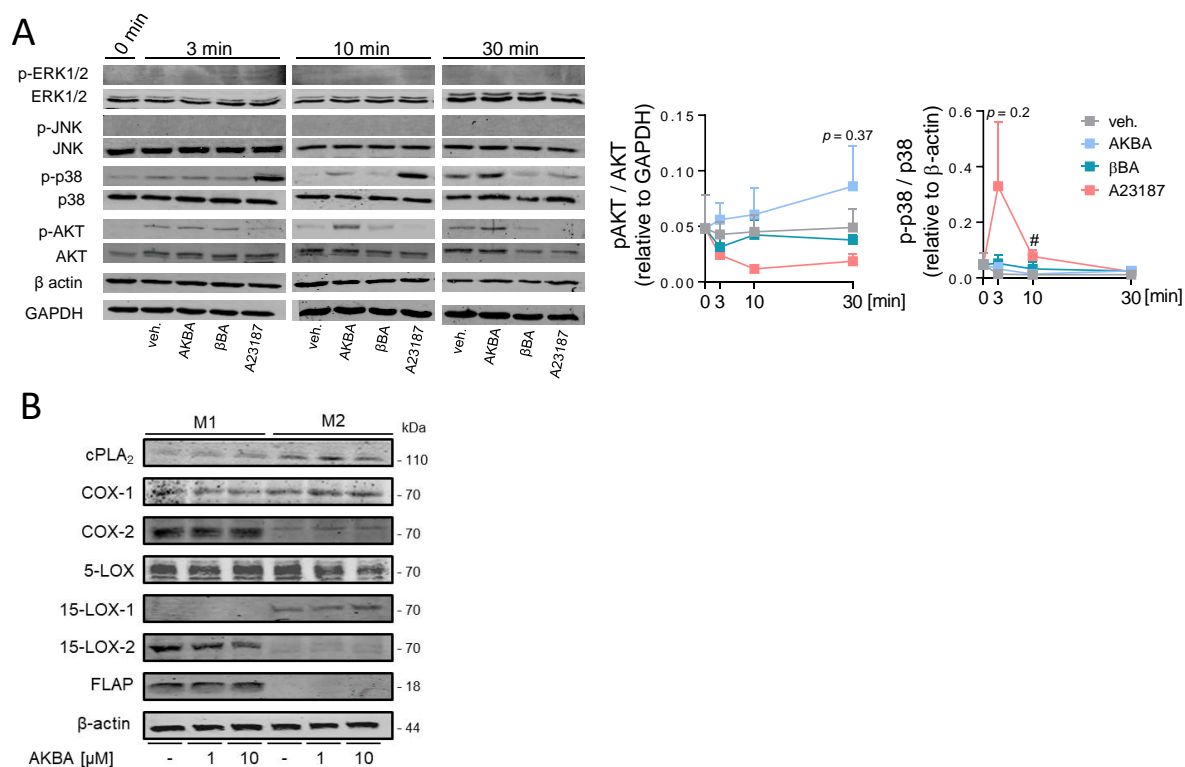

**Figure S5.** Effect of AKBA on protein kinase activation and on LM-biosynthetic enzyme expression. (A) Western blot analysis of phosphorylated MAPK and Akt in M2-MDMs after treatment with AKBA,  $\beta$ BA (10  $\mu$ M, each) or A23187 (2.5  $\mu$ M) for the indicated times. Exemplary plots are shown for each MAPK or Akt, and densitometric analysis of phosphorylation of AKT and p38 MAPK, normalized to  $\beta$ -actin or GAPDH;  $n = 4-6$  separate donors; unpaired Student's  $t$ -test #  $p > 0.05$ , A23187 versus vehicle. (B) M1- or M2-MDM were incubated with 1 or 10  $\mu$ M AKBA for 48 h at 37  $^{\circ}$ C and 5%  $\text{CO}_2$ . Then cells were harvested and the amounts of the indicated proteins were assessed by Western Blot. Data are representative for 3 independent experiments.

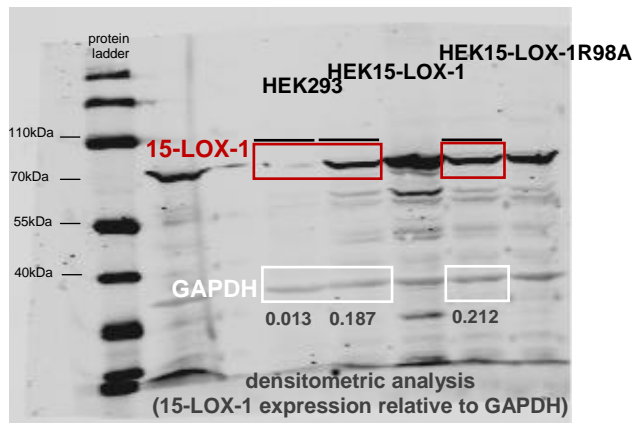

**Figure S6.** Expression of wt- and R98A-mutant-15-LOX-1 in HEK293 cells at the protein level.



|                     |                    | PMNL      |             | monocytes    |              | M1-like MDMs |             | M2-like MDMs |              |
|---------------------|--------------------|-----------|-------------|--------------|--------------|--------------|-------------|--------------|--------------|
|                     |                    | veh.      | AKBA        | veh.         | AKBA         | veh.         | AKBA        | veh.         | AKBA         |
| SPM                 | PDX                | ≤3        | ≤3          | ≤3           | ≤3           | 4.3 ± 2.2    | 7.9 ± 3.9   | 64 ± 10      | 177 ± 4.3    |
|                     | PD1                | ≤3        | ≤3          | 7.4 ± 2.1    | 7.6 ± 1.9    | 5.4 ± 2.1    | 8.6 ± 3.8   | 78 ± 10      | 243 ± 4.1    |
|                     | MaR1               | ≤3        | ≤3          | 3.9 ± 1.0    | 6.1 ± 1.7    | ≤3           | ≤3          | 34 ± 7.1     | 48 ± 14      |
|                     | RvD2               | ≤3        | ≤3          | ≤3           | ≤3           | ≤3           | ≤3          | 3.0 ± 0.5    | 6.2 ± 2.0    |
|                     | RvD5               | ≤3        | ≤3          | 3.6 ± 1.0    | 3.8 ± 0.6    | ≤3           | 4.0 ± 2.2   | 208 ± 5.2    | 212 ± 64     |
|                     | LXA <sub>4</sub>   | ≤3        | ≤3          | ≤3           | ≤3           | ≤3           | ≤3          | ≤3           | 13 ± 2.9     |
| monohydroxylated FA | 17-HDHA            | 3.6 ± 1.6 | 8.1 ± 2.3   | 47 ± 9       | 60 ± 12      | 259 ± 100    | 613 ± 269   | 4395 ± 595   | 5581 ± 1579  |
|                     | 15-HEPE            | ≤3        | ≤3          | 4.9 ± 0.7    | 3.6 ± 0.7    | 34 ± 14      | 59 ± 28     | 783 ± 156    | 1113 ± 290   |
|                     | 15-HETE            | 33 ± 16.4 | 101 ± 1.1   | 79 ± 4.8     | 92 ± 10      | 496 ± 207    | 1134 ± 506  | 6592 ± 1003  | 12493 ± 2976 |
|                     | 14-HDHA            | 7.5 ± 3.3 | 17 ± 5.9    | 1475 ± 385   | 2373 ± 523   | 27 ± 6.4     | 29 ± 3.4    | 908 ± 140    | 1606 ± 424   |
|                     | 12-HEPE            | 3.6 ± 1.2 | 15 ± 3.6    | 640 ± 110    | 932 ± 180    | 10 ± 3.6     | 9.1 ± 3.0   | 132 ± 24     | 184 ± 47     |
|                     | 12-HETE            | 95 ± 34.1 | 304 ± 70    | 14515 ± 1408 | 18547 ± 1174 | 102 ± 44     | 119 ± 40    | 714 ± 111    | 1222 ± 305   |
| COX                 | 7-HDHA             | ≤3        | ≤3          | 4.7 ± 0.7    | 7.9 ± 1.0    | 16 ± 4.0     | 19 ± 7.7    | 179 ± 21     | 176 ± 43     |
|                     | 4-HDHA             | ≤3        | ≤3          | ≤3           | ≤3           | 12 ± 2.2     | 12 ± 2.7    | 24 ± 7.2     | 26 ± 6.5     |
|                     | 18-HEPE            | ≤3        | ≤3          | 4.2 ± 0.5    | 3.2 ± 0.4    | 6.9 ± 1.2    | 4.9 ± 1.1   | 16 ± 2.6     | 47 ± 11      |
|                     | PGE <sub>2</sub>   | 3.1 ± 1.1 | 9.3 ± 4.2   | 60 ± 5.7     | 115 ± 7      | 837 ± 307    | 897 ± 335   | 61 ± 14      | 135 ± 34     |
|                     | PGD <sub>2</sub>   | ≤3        | ≤3          | 14 ± 2.2     | 21 ± 1.7     | 32 ± 8.8     | 37 ± 10     | 18 ± 3.5     | 55 ± 13      |
|                     | PGF <sub>2α</sub>  | ≤3        | ≤3          | 26 ± 2.6     | 14 ± 1.7     | 193 ± 88     | 154 ± 62    | 51 ± 13      | 34 ± 8.0     |
| 5-LOX               | TXB <sub>2</sub>   | 53 ± 17   | 74 ± 29     | 7814 ± 1588  | 2287 ± 525   | 4070 ± 1575  | 3613 ± 1552 | 2769 ± 651   | 1364 ± 368   |
|                     | 5-HEPE             | ≤3        | ≤3          | ≤3           | ≤3           | 72 ± 27      | 49 ± 22     | 36 ± 8.8     | 29 ± 9.3     |
|                     | 5-HETE             | 50 ± 2.4  | 14 ± 3.9    | 36 ± 3.2     | 12 ± 1.8     | 813 ± 269    | 682 ± 299   | 298 ± 58     | 288 ± 71     |
|                     | t-LTB <sub>4</sub> | 3.8 ± 1.2 | ≤3          | 70 ± 17      | 65 ± 13      | 110 ± 40     | 107 ± 61    | 28 ± 13      | 34 ± 16      |
|                     | LTB <sub>4</sub>   | 28 ± 11   | 6.7 ± 2.2   | 307 ± 93     | 87 ± 20      | 292 ± 150    | 497 ± 354   | 29 ± 10      | 40 ± 12      |
|                     | PUFA               | AA        | 5361 ± 2932 | 7474 ± 2608  | 494 ± 37     | 416 ± 64     | 12845 ± 957 | 16345 ± 942  | 29687 ± 8197 |
| EPA                 |                    | 207 ± 137 | 629 ± 228   | 15 ± 1.8     | 19 ± 3.9     | 2345 ± 423   | 4362 ± 636  | 8177 ± 3454  | 13060 ± 4865 |
| DHA                 |                    | 305 ± 152 | 279 ± 85    | 200 ± 40     | 210 ± 67     | 9091 ± 3252  | 9062 ± 3462 | 22426 ± 6793 | 25612 ± 8070 |

**Table S1.** Modulation of lipid mediator formation in activated 5-LOX-expressing immune cells by AKBA. Human PMNL, monocytes, M1-MDMs and M2-MDMs ( $10^6$  cells, each) were preincubated with 10  $\mu$ M AKBA or vehicle (0.1% DMSO) for 15 min before stimulation with *E. coli* (O6:K2:H1; ratio 1:50) for 90 min at 37 °C. Formed LM were isolated from the supernatants by SPE and analyzed by UPLC-MS-MS. Data are means  $\pm$  S.E.M. given as pg/ $10^6$  cells, n = 3 - 4 , separate donors, each. Relates to Figure 1.

|                     | PMNL               |                   | monocytes  |             | M1-like MDMs |             | M2-like MDMs |              |              |               |
|---------------------|--------------------|-------------------|------------|-------------|--------------|-------------|--------------|--------------|--------------|---------------|
|                     | veh.               | AKBA              | veh.       | AKBA        | veh.         | AKBA        | veh.         | AKBA         |              |               |
| SPM                 | PDX                | ≤ 3               | ≤ 3        | ≤ 3         | ≤ 3          | ≤ 3         | ≤ 3          | 43 ± 18      |              |               |
|                     | PD1                | ≤ 3               | ≤ 3        | 3.8 ± 0.2   | 6.4 ± 1.6    | ≤ 3         | ≤ 3          | 69 ± 32      |              |               |
|                     | MaR1               | ≤ 3               | ≤ 3        | ≤ 3         | 3.6 ± 0.1    | ≤ 3         | ≤ 3          | 16 ± 7.8     |              |               |
|                     | RvD2               | ≤ 3               | ≤ 3        | ≤ 3         | ≤ 3          | ≤ 3         | ≤ 3          | 3.5 ± 1.3    |              |               |
|                     | RvD5               | ≤ 3               | ≤ 3        | ≤ 3         | 4.0 ± 0.8    | ≤ 3         | ≤ 3          | 85 ± 39      |              |               |
|                     | LXA <sub>4</sub>   | ≤ 3               | ≤ 3        | ≤ 3         | ≤ 3          | ≤ 3         | ≤ 3          | 5.3 ± 1.6    |              |               |
| monohydroxylated FA | 17-HDHA            | ≤ 3               | 6.7 ± 2.1  | 17 ± 4.7    | 39 ± 7.6     | 24 ± 4.0    | 122 ± 35     | 61 ± 24      | 1668 ± 692   |               |
|                     | 15-HEPE            | ≤ 3               | ≤ 3        | 3.5 ± 0.4   | 3.5 ± 0.7    | 9.2 ± 2.5   | 21 ± 8.0     | 8.2 ± 2.1    | 614 ± 340    |               |
|                     | 15-HETE            | 4.9 ± 0.5         | 46 ± 2.0   | 33 ± 4.3    | 71 ± 13      | 42 ± 23     | 225 ± 57     | 94 ± 43      | 6778 ± 3556  |               |
|                     | 14-HDHA            | ≤ 3               | 26 ± 13    | 237 ± 26    | 1997 ± 381   | 18 ± 7.5    | 21 ± 4.6     | 16 ± 4.8     | 558 ± 248    |               |
|                     | 12-HEPE            | ≤ 3               | 11 ± 4.3   | 264 ± 72    | 978 ± 171    | ≤ 3         | ≤ 3          | ≤ 3          | 85 ± 45      |               |
|                     | 12-HETE            | 26 ± 6.8          | 460 ± 220  | 3952 ± 596  | 19659 ± 429  | 33 ± 20     | 20 ± 4.0     | 18 ± 5.5     | 423 ± 210    |               |
|                     | 7-HDHA             | ≤ 3               | ≤ 3        | ≤ 3         | 7.3 ± 0.6    | 4.3 ± 1.6   | 8.8 ± 2.4    | 6.9 ± 1.8    | 67 ± 23      |               |
|                     | 4-HDHA             | ≤ 3               | ≤ 3        | ≤ 3         | ≤ 3          | 3.9 ± 1.7   | 8.0 ± 4.1    | 4.7 ± 0.5    | 20 ± 3.8     |               |
|                     | 18-HEPE            | ≤ 3               | ≤ 3        | 3.9 ± 0.1   | 3.1 ± 0.4    | 3.2 ± 1.3   | 4.4 ± 1.1    | 8.7 ± 2.8    | 35 ± 12      |               |
|                     | COX                | PGE <sub>2</sub>  | ≤ 3        | 12 ± 4.3    | 35 ± 3.1     | 101 ± 7.1   | 504 ± 159    | 627 ± 204    | 6.4 ± 1.6    | 45 ± 15       |
|                     |                    | PGD <sub>2</sub>  | ≤ 3        | ≤ 3         | 9.5 ± 1.2    | 19 ± 1.6    | 20 ± 7.5     | 29 ± 8.6     | 3.2 ± 0.5    | 24 ± 8.4      |
|                     |                    | PGF <sub>2α</sub> | ≤ 3        | ≤ 3         | 16 ± 2.0     | 12 ± 1.6    | 104 ± 30     | 120 ± 34     | 7.7 ± 3.8    | 9.2 ± 0.4     |
| TXB <sub>2</sub>    |                    | 31 ± 3.6          | 64 ± 13    | 4808 ± 1114 | 1881 ± 364   | 1665 ± 560  | 2145 ± 860   | 193 ± 65     | 320 ± 52     |               |
| 5-HEPE              |                    | ≤ 3               | ≤ 3        | ≤ 3         | ≤ 3          | 12 ± 7.3    | 20 ± 7.8     | 3.5 ± 0.6    | 13 ± 0.6     |               |
| 5-LOX               | 5-HETE             | 7.2 ± 0.7         | 8.1 ± 2.1  | 366 ± 62    | 196 ± 24.2   | 215 ± 129   | 346 ± 182    | 44 ± 11      | 116 ± 21     |               |
|                     | l-LTB <sub>4</sub> | ≤ 3               | ≤ 3        | 8.5 ± 0.4   | 39 ± 2.1     | 30 ± 19     | 55 ± 29      | 4.4 ± 0.9    | 7.6 ± 2.3    |               |
|                     | LTB <sub>4</sub>   | 3.3 ± 0.6         | ≤ 3        | 10 ± 1.4    | 37 ± 5.4     | 70 ± 44     | 290 ± 190    | 3.0 ± 0.7    | 10 ± 5.3     |               |
|                     | PUFA               | AA                | 1316 ± 379 | 2274 ± 1053 | 273 ± 13     | 752 ± 145   | 3003 ± 1625  | 11018 ± 5080 | 10591 ± 4749 | 29474 ± 10673 |
| EPA                 |                    | 94 ± 35           | 276 ± 167  | 11 ± 1.1    | 45 ± 15      | 220 ± 54    | 2862 ± 1261  | 1379 ± 622   | 10144 ± 3332 |               |
| DHA                 |                    | 159 ± 32          | 140 ± 62   | 89 ± 11     | 179 ± 42     | 2738 ± 1239 | 7141 ± 5553  | 8666 ± 3476  | 22611 ± 738  |               |

**Table S2.** Induction of lipid mediator formation in unstimulated 5-LOX-expressing immune cells by AKBA. Human PMNL, monocytes, M1-MDMs and M2-MDMs (10<sup>6</sup> cells, each) were incubated with 10 μM AKBA or vehicle (0.1% DMSO) for 90 min at 37 °C. Formed LM were isolated by SPE and analyzed by UPLC-MS/MS. Data are means ± S.E.M. given as pg/10<sup>6</sup> cells, n = 4 separate donors, each. Relates to Figure 2.

0 1 5

|                    | untreated   | <i>e. coli</i> | nontarget + AKBA | ALOX15A + AKBA | -fold |
|--------------------|-------------|----------------|------------------|----------------|-------|
| 5-HEPE             | 4.8 ± 0.2   | 45 ± 17        | 33 ± 18          | 27 ± 15        | 0.8   |
| 5-HETE             | 23 ± 6.6    | 382 ± 199      | 266 ± 180        | 263 ± 185      | 1.0   |
| t-LTB <sub>4</sub> | 9.5 ± 1.8   | 89 ± 24        | 32 ± 10          | 17 ± 9.4       | 0.5   |
| LTB <sub>4</sub>   | 6.7 ± 2.5   | 76 ± 39        | 23 ± 14          | 23 ± 15        | 1.0   |
| PGE <sub>2</sub>   | 31 ± 20     | 113 ± 31       | 107 ± 42         | 80 ± 40        | 0.7   |
| PGD <sub>2</sub>   | 4.4 ± 0.2   | 36 ± 21        | 48 ± 14          | 27 ± 6.4       | 0.6   |
| PGF <sub>2α</sub>  | 29 ± 5.1    | 52 ± 8.2       | 40 ± 3.0         | 45 ± 7.7       | 1.1   |
| TXB <sub>2</sub>   | 484 ± 54    | 1710 ± 146     | 640 ± 120        | 857 ± 14       | 1.3   |
| 17-HDHA            | 101 ± 35    | 7035 ± 2406    | 3386 ± 1601      | 2046 ± 884     | 0.6   |
| 15-HEPE            | 14 ± 4.9    | 1230 ± 662     | 542 ± 239        | 256 ± 115      | 0.5   |
| 15-HETE            | 110 ± 57    | 10745 ± 5456   | 6648 ± 3101      | 3477 ± 1643    | 0.5   |
| 14-HDHA            | 12 ± 3.8    | 1402 ± 388     | 945 ± 505        | 534 ± 325      | 0.6   |
| 12-HEPE            | 3.7 ± 0.4   | 180 ± 83       | 95 ± 40          | 48 ± 21        | 0.5   |
| 12-HETE            | 15 ± 3.4    | 1073 ± 442     | 532 ± 270        | 306 ± 178      | 0.6   |
| 7-HDHA             | 12 ± 1.7    | 350 ± 91       | 204 ± 107        | 128 ± 73       | 0.6   |
| 4-HDHA             | 7.5 ± 1.0   | 38 ± 12        | 38 ± 21          | 35 ± 21        | 0.9   |
| 18-HEPE            | 5.0 ± 1.3   | 26 ± 9.5       | 42 ± 12          | 22 ± 5.7       | 0.5   |
| PDX                | ≤3          | 23 ± 10        | 25 ± 15          | 11 ± 6         | 0.4   |
| PD1                | ≤3          | 439 ± 217      | 109 ± 35         | 50 ± 19        | 0.5   |
| MaR1               | ≤3          | 141 ± 57       | 23 ± 11          | 11 ± 6         | 0.5   |
| RvD2               | ≤3          | 13 ± 6.1       | 7.1 ± 1.8        | 3.4 ± 0.9      | 0.5   |
| RvD5               | ≤3          | 705 ± 247      | 93 ± 34          | 40 ± 18        | 0.4   |
| LXA <sub>4</sub>   | ≤3          | 8.2 ± 4.1      | 15 ± 4.6         | 8.3 ± 2.0      | 0.6   |
| AA                 | 5518 ± 1961 | 42593 ± 13960  | 51543 ± 29110    | 61028 ± 33984  | 1.2   |
| EPA                | 984 ± 152   | 7597 ± 3244    | 13682 ± 7457     | 17501 ± 9147   | 1.3   |
| DHA                | 7534 ± 2965 | 57336 ± 11875  | 38259 ± 19758    | 44323 ± 23488  | 1.2   |

**Table S3.** Effect of AKBA after 15-LOX-1 knockdown in M2 macrophages. Human monocytes-derived macrophages ( $2 \times 10^6$  cells) differentiated with M-CSF were transfected with nontarget or ALOX15A siRNA for 48 h during polarization with IL-4 (20 ng/mL). LM production after exposure of macrophages to *E. coli* (ratio 1:50) or AKBA (10  $\mu$ M) for 180 min, shown as means  $\pm$  S.E.M. in pg/ $2 \times 10^6$  cells and as a heatmap representing –fold change of ALOX15A + AKBA-versus non-target + AKBA-treated cells, n = 4 separate donors.

|                    | 0           |                | 1    |                | 70             |      |      |      |
|--------------------|-------------|----------------|------|----------------|----------------|------|------|------|
|                    | veh.        | AKBA           | veh. | AKBA           | veh.           | AKBA | veh. | AKBA |
| 5-HEPE             | 6.2 ± 1.6   | 14 ± 4.7       | 2.3  | 482 ± 184      | 1044 ± 358     | 2.2  |      |      |
| 5-HETE             | 6.1 ± 1.0   | 44 ± 17        | 7.2  | 28 ± 7         | 152 ± 35       | 5.4  |      |      |
| t-LTB <sub>4</sub> | 3.8 ± 1.0   | 12 ± 4.0       | 3.1  | 10 ± 2.9       | 14 ± 3.7       | 1.4  |      |      |
| LTB <sub>4</sub>   | 5.3 ± 1.8   | 12 ± 2.8       | 2.2  | 7.0 ± 2.7      | 16 ± 5.8       | 2.3  |      |      |
| PGE <sub>2</sub>   | 28 ± 11     | 50 ± 11        | 1.8  | 24 ± 8         | 61 ± 14        | 2.6  |      |      |
| PGD <sub>2</sub>   | 12 ± 3.9    | 24 ± 5.4       | 2.0  | 5.4 ± 1.0      | 16 ± 3.4       | 3.0  |      |      |
| PGF <sub>2α</sub>  | 84 ± 55     | 31 ± 5.4       | 0.4  | 92 ± 44        | 61 ± 29        | 0.7  |      |      |
| TXB <sub>2</sub>   | 1680 ± 948  | 1807 ± 858     | 1.1  | 1595 ± 740     | 1172 ± 393     | 0.7  |      |      |
| 17-HDHA            | 13 ± 0.4    | 229 ± 18       | 17.8 | 79 ± 10        | 1145 ± 438     | 14.4 |      |      |
| 15-HEPE            | 6.6 ± 2.3   | 99 ± 8.6       | 14.9 | 79 ± 16        | 2754 ± 1497    | 34.8 |      |      |
| 15-HETE            | 12 ± 1.8    | 850 ± 231      | 69.6 | 25 ± 2.3       | 1762 ± 563     | 70.4 |      |      |
| 14-HDHA            | 3.6 ± 0.4   | 83 ± 14        | 23.0 | 25 ± 4.3       | 469 ± 193      | 18.7 |      |      |
| 12-HEPE            | 4.3 ± 1.4   | 23 ± 4.2       | 5.4  | 102 ± 23       | 980 ± 471      | 9.6  |      |      |
| 12-HETE            | 6.3 ± 1.4   | 72 ± 25        | 11.4 | 15 ± 1.5       | 115 ± 34       | 7.4  |      |      |
| 7-HDHA             | 14 ± 3.9    | 38 ± 8.7       | 2.7  | 97 ± 20        | 145 ± 34       | 1.5  |      |      |
| 4-HDHA             | 1.9 ± 0.2   | 8.8 ± 1.9      | 4.5  | 35 ± 11        | 70 ± 1.9       | 2.0  |      |      |
| 18-HEPE            | 17 ± 4.9    | 31 ± 12        | 1.8  | 2184 ± 610     | 3280 ± 767     | 1.5  |      |      |
| PD1                | ≤3          | 5.9 ± 2.5      | 2.0  | ≤3             | 12 ± 4.0       | 3.9  |      |      |
| PDX                | ≤3          | 3.6 ± 0.3      | 1.2  | 3.8 ± 0.7      | 13 ± 2.8       | 3.4  |      |      |
| MaR1               | ≤3          | 3.8 ± 0.5      | 1.3  | ≤3             | 21 ± 9.3       | 7.1  |      |      |
| RvD2               | ≤3          | ≤3             | 1.0  | 3.4 ± 0.4      | 7.1 ± 2.3      | 2.1  |      |      |
| RvD5               | ≤3          | 22 ± 2.3       | 7.3  | 3.4 ± 0.7      | 94 ± 38        | 27.5 |      |      |
| LXA <sub>4</sub>   | 5.1 ± 1.2   | 10 ± 3.7       | 2.0  | 9 ± 2.1        | 14 ± 3.8       | 1.6  |      |      |
| AA                 | 9058 ± 4157 | 102130 ± 47345 | 11.3 | 15055 ± 5385   | 171493 ± 73840 | 11.4 |      |      |
| EPA                | 6421 ± 2154 | 27951 ± 10876  | 4.4  | 147195 ± 42815 | 357772 ± 37365 | 2.4  |      |      |
| DHA                | 2165 ± 869  | 11365 ± 4595   | 5.2  | 17053 ± 4450   | 47005 ± 5827   | 2.8  |      |      |

**Table S4.** Effect of AKBA on M2-MDMs after DHA/EPA supplementation. M2-MDMs were co-incubated with 3 µg/mL of a DHA- and EPA-enriched fatty acid supplementary plus AKBA (10 µM) or vehicle (0.1% DMSO) for 180 min at 37°C. Formed LM were isolated by SPE and analyzed by UPLC-MS/MS. Data are shown as mean ± S.E.M. in pg/2 × 10<sup>6</sup> cells and as a heatmap representing the -fold change of AKBA- versus vehicle-treated cells, n = 4 separate donors.

|                    | + Ca <sup>2+</sup> |                 |       | + EDTA         |                 |      | + EDTA/BAPTA-AM |                 |      |  |
|--------------------|--------------------|-----------------|-------|----------------|-----------------|------|-----------------|-----------------|------|--|
|                    | veh.               | + AKBA          |       | veh.           | + AKBA          |      | veh.            | + AKBA          |      |  |
| 5-HEPE             | 7.4 ± 1.7          | 30 ± 12         | 4.1   | 7.8 ± 2.1      | 22 ± 6.8        | 2.7  | 8.9 ± 2.2       | 18 ± 4.4        | 2.0  |  |
| 5-HETE             | 13 ± 3.8           | 160 ± 78        | 12.5  | 33 ± 16        | 131 ± 55        | 4.0  | 35 ± 13         | 109 ± 43        | 3.1  |  |
| t-LTB <sub>4</sub> | 15 ± 3.3           | 30 ± 8.7        | 2.0   | 17 ± 2.2       | 34 ± 15         | 2.0  | 12 ± 1.0        | 35 ± 21         | 3.0  |  |
| LTB <sub>4</sub>   | 12 ± 2.4           | 22 ± 7.5        | 1.9   | 18 ± 5.7       | 14 ± 2.1        | 0.8  | 12 ± 2.2        | 14 ± 4.2        | 1.1  |  |
| PGE <sub>2</sub>   | 54 ± 33            | 100 ± 3.0       | 1.9   | 30 ± 11        | 94 ± 31         | 3.2  | 28 ± 9.2        | 138 ± 51        | 5.0  |  |
| PGD <sub>2</sub>   | 4.0 ± 1.7          | 26 ± 11         | 6.6   | 3.1 ± 0.5      | 31 ± 17         | 9.9  | 6.3 ± 3.0       | 37 ± 22         | 5.8  |  |
| PGF <sub>2α</sub>  | 16 ± 1.2           | 17 ± 3.6        | 1.0   | 17 ± 2.5       | 23 ± 2.9        | 1.4  | 16 ± 0.7        | 32 ± 4.4        | 2.0  |  |
| TXB <sub>2</sub>   | 663 ± 241          | 722 ± 315       | 1.1   | 459 ± 100      | 498 ± 72        | 1.1  | 453 ± 159       | 1064 ± 413      | 2.3  |  |
| 17-HDHA            | 43 ± 10            | 1649 ± 561      | 38.5  | 49 ± 6.1       | 1387 ± 487      | 28.4 | 183 ± 62        | 1680 ± 862      | 9.2  |  |
| 15-HEPE            | 7.8 ± 1.1          | 336 ± 108       | 43.1  | 8.5 ± 0.4      | 296 ± 117       | 34.7 | 17 ± 4.6        | 297 ± 179       | 17.8 |  |
| 15-HETE            | 25 ± 3.5           | 4544 ± 1779     | 179.3 | 47 ± 10        | 3778 ± 1751     | 80.8 | 107 ± 32        | 4171 ± 2775     | 38.9 |  |
| 14-HDHA            | 7.6 ± 2.6          | 444 ± 145       | 58.0  | 10 ± 1.3       | 460 ± 198       | 44.0 | 15 ± 5.0        | 536 ± 323       | 35.8 |  |
| 12-HEPE            | 3.0 ± 0.8          | 53 ± 16         | 17.9  | 2.7 ± 0.2      | 51 ± 18         | 19.3 | 4.4 ± 1.6       | 51 ± 29         | 11.6 |  |
| 12-HETE            | 12 ± 2.8           | 256 ± 95        | 21.2  | 14 ± 3.9       | 262 ± 126       | 18.6 | 17 ± 3.7        | 266 ± 153       | 15.5 |  |
| 7-HDHA             | 9.0 ± 0.3          | 71 ± 20         | 7.9   | 11 ± 2.0       | 76 ± 27         | 6.7  | 11 ± 1.9        | 93 ± 46         | 8.6  |  |
| 4-HDHA             | 7.7 ± 2.3          | 26 ± 9.1        | 3.4   | 7.6 ± 2.2      | 26 ± 9.1        | 3.4  | 13 ± 4.2        | 19 ± 2.3        | 1.5  |  |
| PDX                | ≤ 3                | 2.8 ± 1.3       | 0.9   | ≤ 3            | ≤ 3             | 1.0  | ≤ 3             | ≤ 3             | 1.0  |  |
| PD1                | ≤ 3                | 17 ± 6.3        | 5.5   | ≤ 3            | 16 ± 7.4        | 5.4  | ≤ 3             | 20 ± 14         | 6.8  |  |
| MaR1               | ≤ 3                | 12 ± 7.4        | 4.1   | ≤ 3            | 15 ± 11         | 5.2  | ≤ 3             | 24 ± 19         | 8.1  |  |
| RvD2               | ≤ 3                | ≤ 3             | 1.0   | ≤ 3            | ≤ 3             | 1.0  | ≤ 3             | ≤ 3             | 1.0  |  |
| RvD5               | ≤ 3                | 79 ± 43         | 26.5  | ≤ 3            | 91 ± 55         | 30.4 | ≤ 3             | 29 ± 19         | 9.6  |  |
| LXA <sub>4</sub>   | 7.3 ± 1.8          | 7.9 ± 0.9       | 1.1   | 7.7 ± 3.6      | 3.1 ± 0.5       | 0.4  | 6.3 ± 1.5       | 8.7 ± 3.2       | 1.4  |  |
| AA                 | 151888 ± 55602     | 686514 ± 380906 | 4.5   | 132677 ± 58023 | 683429 ± 400372 | 5.2  | 277182 ± 140667 | 943634 ± 333106 | 3.4  |  |
| EPA                | 40730 ± 13045      | 235471 ± 128111 | 5.8   | 32783 ± 14006  | 227232 ± 136306 | 6.9  | 64814 ± 30199   | 304053 ± 135018 | 4.7  |  |
| DHA                | 29251 ± 12170      | 70464 ± 32619   | 2.4   | 10198 ± 2537   | 76432 ± 38459   | 7.5  | 60299 ± 27902   | 114367 ± 34624  | 1.9  |  |

**Table S5.** 15-LOX-1 activation by AKBA in M2-MDMs is insensitive to Ca<sup>2+</sup>. Human M2-MDM were preincubated 20 min with PBS containing Ca<sup>2+</sup> (1 mM), EDTA (0.5 mM) or EDTA plus BAPTA-AM (20 μM) before cells were stimulated with AKBA (10 μM) or vehicle (0.1% DMSO) for 180 min at 37°C. Formed LM were isolated by SPE and analyzed by UPLC-MS-MS. Data are shown as mean ± S.E.M. in pg/2 × 10<sup>6</sup> MDM and as a heatmap representing the –fold change of AKBA- versus vehicle-treated cells; n = 3 independent experiments.

| AKBA               |              |                  |                  |     |                  |     |                  |     |                  |     |                 |     |
|--------------------|--------------|------------------|------------------|-----|------------------|-----|------------------|-----|------------------|-----|-----------------|-----|
| 0                  | 1            | 5                | AKBA             |     |                  |     |                  |     |                  |     |                 |     |
|                    | veh.         | skeinone L       |                  |     | U0126            |     | SP600125         |     | LY 294002        |     | staurosporine   |     |
| 5-HEPE             | 8.3 ± 3.8    | 26 ± 2.9         | 23 ± 4.5         | 0.9 | 17 ± 1.0         | 0.7 | 45 ± 1.9         | 1.8 | 28 ± 2.6         | 1.1 | 30 ± 2.9        | 1.2 |
| 5-HETE             | 13 ± 5.8     | 149 ± 17         | 124 ± 21         | 0.8 | 58 ± 16          | 0.4 | 273 ± 29         | 1.8 | 158 ± 16         | 1.1 | 157 ± 29        | 1.1 |
| t-LTB <sub>4</sub> | 6.6 ± 1.2    | 12 ± 1.3         | 12 ± 2.8         | 1.0 | 7.9 ± 2.2        | 0.7 | 23 ± 3.2         | 2.0 | 13 ± 1.4         | 1.1 | 12 ± 0.4        | 1.0 |
| LTB <sub>4</sub>   | 3.6 ± 0.5    | 8.5 ± 1.0        | 11 ± 1.8         | 1.3 | 5.6 ± 1.0        | 0.7 | 14 ± 1.5         | 1.6 | 8.4 ± 2.1        | 1.0 | 8.3 ± 0.6       | 1.0 |
| PGE <sub>2</sub>   | 12 ± 5.3     | 42 ± 6.8         | 46 ± 10          | 1.1 | 46 ± 16          | 1.1 | 43 ± 8.7         | 1.0 | 42 ± 6.7         | 1.0 | 46 ± 10         | 1.1 |
| PGD <sub>2</sub>   | 6.3 ± 1.8    | 19 ± 6.5         | 20 ± 10          | 1.0 | 18 ± 10          | 0.9 | 17 ± 4.6         | 0.9 | 16 ± 4.4         | 0.8 | 19 ± 8.3        | 1.0 |
| PGF <sub>2α</sub>  | 30 ± 8.7     | 45 ± 16          | 45 ± 16          | 1.0 | 48 ± 15          | 1.1 | 40 ± 10          | 0.9 | 38 ± 13          | 0.8 | 40 ± 12         | 0.9 |
| TXB <sub>2</sub>   | 895 ± 503    | 1407 ± 649       | 1291 ± 634       | 0.9 | 1212 ± 684       | 0.9 | 1082 ± 443       | 0.8 | 1179 ± 456       | 0.8 | 1274 ± 599      | 0.9 |
| 17-HDHA            | 14 ± 4.5     | 455 ± 134        | 523 ± 278        | 1.1 | 523 ± 342        | 1.1 | 738 ± 339        | 1.6 | 454 ± 148        | 1.0 | 784 ± 425       | 1.7 |
| 15-HEPE            | 6.9 ± 2.2    | 46 ± 18          | 61 ± 42          | 1.3 | 75 ± 54          | 1.6 | 92 ± 53          | 2.0 | 51 ± 24          | 1.1 | 84 ± 54         | 1.8 |
| 15-HETE            | 14 ± 4.8     | 687 ± 217        | 726 ± 431        | 1.1 | 962 ± 694        | 1.4 | 1170 ± 528       | 1.7 | 692 ± 266        | 1.0 | 1066 ± 585      | 1.6 |
| 14-HDHA            | 2.6 ± 1.0    | 100 ± 33         | 135 ± 86         | 1.4 | 139 ± 96         | 1.4 | 177 ± 80         | 1.8 | 88 ± 40          | 0.9 | 155 ± 88        | 1.5 |
| 12-HEPE            | 4.9 ± 2.8    | 17 ± 3.5         | 22 ± 11          | 1.3 | 23 ± 9.4         | 1.3 | 29 ± 7.9         | 1.7 | 15 ± 2.9         | 0.9 | 21 ± 7.9        | 1.2 |
| 12-HETE            | 4.8 ± 1.2    | 78 ± 2.6         | 96 ± 34          | 1.2 | 92 ± 31          | 1.2 | 132 ± 25         | 1.7 | 75 ± 7.7         | 1.0 | 89 ± 26         | 1.1 |
| 7-HDHA             | 1.7 ± 0.1    | 33 ± 6.8         | 28 ± 3.0         | 0.9 | 18 ± 2.7         | 0.6 | 58 ± 7.0         | 1.8 | 31 ± 4.1         | 1.0 | 34 ± 1.2        | 1.1 |
| 4-HDHA             | 4.3 ± 1.2    | 39 ± 6.3         | 38 ± 10          | 1.0 | 26 ± 6.2         | 0.7 | 60 ± 3.8         | 1.6 | 38 ± 4.9         | 1.0 | 38 ± 6.8        | 1.0 |
| 18-HEPE            | 15 ± 3.7     | 23 ± 5.2         | 19 ± 7.9         | 0.8 | 21 ± 2.8         | 0.9 | 45 ± 1.6         | 1.9 | 24 ± 3.8         | 1.0 | 31 ± 7.5        | 1.0 |
| PDX                | ≤3           | ≤3               | ≤3               | 1.0 | ≤3               | 1.0 | 4.6 ± 2.6        | 1.5 | ≤3               | 1.0 | ≤3              | 1.0 |
| PD1                | ≤3           | 5.0 ± 1.6        | 6.5 ± 3.6        | 1.3 | 6.3 ± 4.3        | 1.3 | 8.4 ± 2.9        | 1.7 | 5.0 ± 1.9        | 1.0 | 6.8 ± 3.2       | 1.3 |
| MaR1               | ≤3           | ≤3               | 4.0 ± 2.8        | 1.3 | ≤3               | 1.0 | 5.7 ± 4.0        | 1.9 | ≤3               | 1.0 | 3.4 ± 2.2       | 1.1 |
| RvD2               | ≤3           | ≤3               | ≤3               | 1.0 | ≤3               | 1.0 | ≤3               | 1.0 | ≤3               | 1.0 | ≤3              | 1.0 |
| RvD5               | ≤3           | 13 ± 7.1         | 21 ± 16          | 1.6 | 23 ± 19          | 1.8 | 35 ± 24          | 2.6 | 12 ± 7.5         | 0.9 | 25 ± 19         | 1.9 |
| LXA <sub>4</sub>   | ≤3           | ≤3               | ≤3               | 1.2 | ≤3               | 1.0 | ≤3               | 1.0 | ≤3               | 1.0 | ≤3              | 1.0 |
| AA                 | 58918 ± 9762 | 1310641 ± 126069 | 1610951 ± 160055 | 1.2 | 1638383 ± 138815 | 1.3 | 1644521 ± 166411 | 1.3 | 1417700 ± 112040 | 1.1 | 1549322 ± 89730 | 1.2 |
| EPA                | 44611 ± 6616 | 428833 ± 42052   | 572284 ± 90068   | 1.3 | 563944 ± 16119   | 1.3 | 627652 ± 63377   | 1.5 | 505973 ± 66680   | 1.2 | 588311 ± 51272  | 1.4 |
| DHA                | 18847 ± 6594 | 228971 ± 13289   | 263136 ± 3700    | 1.1 | 276276 ± 14946   | 1.2 | 277151 ± 16747   | 1.2 | 250135 ± 18990   | 1.1 | 271821 ± 5850   | 1.2 |

**Table S6.** Effects of kinase inhibitors on AKBA-induced LM formation in M2-MDM. M2-MDMs ( $2 \times 10^6$ ) were pre-treated with the respective kinase inhibitors as follows: 1  $\mu$ M skepinone-L, 3  $\mu$ M U0126, 10  $\mu$ M SP600125; 3  $\mu$ M LY-294002, and 1  $\mu$ M staurosporine. After 10 min at 37 °C, 10  $\mu$ M AKBA were added and the cells were further incubated for 180 min at 37°C. Formed LM were isolated from the supernatants by SPE and analyzed by UPLC-MS-MS. Data are given as mean  $\pm$  S.E.M. in pg/  $10^6$  cells and shown in a heatmap representing the  $-$ fold change of stimulus-treated vs. vehicle-treated M2-MDM, n = 3 – 7, separate donors.

|                    | 293            |                 | 5-LOX/FLAP |               |                 |      | 12-LOX        |                | 15-LOX-1 |             | 15-LOX-2      |      |               |                 |      |
|--------------------|----------------|-----------------|------------|---------------|-----------------|------|---------------|----------------|----------|-------------|---------------|------|---------------|-----------------|------|
|                    | veh.           | AKBA            | veh.       | AKBA          | veh.            | AKBA | veh.          | AKBA           | veh.     | AKBA        | veh.          | AKBA |               |                 |      |
| 5-HEPE             | 53 ± 50        | 41 ± 30         | 0.8        | 786 ± 135     | 3690 ± 1003     | 4.7  | 46 ± 40       | 63 ± 57        | 1.4      | 3.4 ± 1.2   | 6.0 ± 0.7     | 1.8  | 39 ± 38       | 57 ± 46         | 1.5  |
| 5-HETE             | 175 ± 132      | 74 ± 25         | 0.4        | 345 ± 29      | 19198 ± 5913    | 55.7 | 88 ± 30       | 240 ± 213      | 2.7      | 5.0 ± 1.5   | 12 ± 1.1      | 2.5  | 40 ± 20       | 51 ± 8.1        | 1.3  |
| 1-LTB <sub>4</sub> | 12 ± 7.0       | 8.5 ± 3.2       | 0.7        | 361 ± 74      | 1733 ± 449      | 4.8  | 24 ± 11       | 84 ± 30        | 3.5      | 2.3 ± 0.8   | 2.2 ± 0.1     | 0.9  | 18 ± 11       | 12 ± 1.3        | 0.6  |
| LTB <sub>4</sub>   | 12 ± 7.9       | 4.5 ± 1.3       | 0.4        | 437 ± 88      | 3953 ± 882      | 9.0  | 10 ± 1.8      | 30 ± 10        | 3.2      | 3.9 ± 0.3   | 4.8 ± 0.7     | 1.2  | 4.9 ± 2.5     | 7.7 ± 1.2       | 1.6  |
| 5,15-diHETE        | 10 ± 2.7       | 3.9 ± 0.9       | 0.4        | 233 ± 51      | 513 ± 199       | 2.2  | 8.6 ± 2.3     | 22 ± 8.6       | 2.5      | 16 ± 9      | 19 ± 3.8      | 1.2  | 16 ± 1.2      | 72 ± 18         | 4.6  |
| PGE <sub>2</sub>   | 2.5 ± 0.1      | 6.6 ± 3.1       | 2.6        | 44 ± 14       | 56 ± 30         | 1.3  | 8.1 ± 3.0     | 10 ± 2.8       | 1.2      | 0.9 ± 0.3   | 0.4 ± 0.1     | 0.4  | 9.1 ± 1.1     | 11 ± 0.6        | 1.2  |
| PGD <sub>2</sub>   | 0.5 ± 0.1      | 1.1 ± 0.4       | 2.0        | 37 ± 3.4      | 78 ± 27         | 2.1  | 1.3 ± 0.3     | 1.2 ± 0.6      | 0.9      | 6.5 ± 4.9   | 4.1 ± 0.1     | 0.6  | 0.8 ± 0.2     | 1.4 ± 0.4       | 1.8  |
| 17-HDHA            | 23 ± 11        | 20 ± 3.6        | 0.9        | 570 ± 128     | 1625 ± 637      | 2.9  | 42 ± 21       | 56 ± 23        | 1.3      | 10 ± 3.7    | 675 ± 33      | 64.9 | 2898 ± 905    | 20781 ± 1795    | 7.2  |
| 15-HEPE            | 6.7 ± 2.6      | 5.6 ± 1.1       | 0.8        | 134 ± 32      | 183 ± 43        | 1.4  | 11 ± 4.4      | 16 ± 3.1       | 1.5      | 3.7 ± 1.1   | 198 ± 27      | 52.9 | 1233 ± 95     | 6594 ± 761      | 5.3  |
| 15-HETE            | 40 ± 22        | 54 ± 27         | 1.4        | 578 ± 148     | 965 ± 290       | 1.7  | 24 ± 1.8      | 63 ± 27        | 2.6      | 9.4 ± 1.3   | 682 ± 88      | 72.9 | 2326 ± 861    | 26734 ± 3923    | 11.5 |
| 14-HDHA            | 14 ± 9.1       | 21 ± 3.2        | 1.5        | 146 ± 74      | 563 ± 115       | 3.8  | 4195 ± 549    | 16730 ± 5642   | 4.0      | 7 ± 1.0     | 497 ± 15      | 68.4 | 31 ± 10       | 178 ± 27        | 5.7  |
| 12-HEPE            | 8.3 ± 3.7      | 9.0 ± 2.2       | 1.1        | 149 ± 63      | 505 ± 140       | 3.4  | 2563 ± 507    | 13281 ± 3630   | 5.2      | 2.5 ± 0.2   | 55 ± 6        | 21.9 | 15 ± 2.0      | 32 ± 2.4        | 2.1  |
| 12-HETE            | 35 ± 16        | 42 ± 10         | 1.2        | 352 ± 173     | 4807 ± 2247     | 13.7 | 7253 ± 1138   | 39504 ± 11166  | 5.4      | 9 ± 3.7     | 134 ± 9       | 14.5 | 2046 ± 2019   | 1504 ± 1427     | 0.7  |
| 7-HDHA             | 20 ± 6         | 15 ± 5.7        | 0.8        | 962 ± 344     | 4723 ± 1478     | 4.9  | 11 ± 1.8      | 19 ± 1.6       | 1.6      | 5.7 ± 1.2   | 41 ± 1.7      | 7.3  | 10 ± 1.9      | 10 ± 0.9        | 1.0  |
| 4-HDHA             | ≤3             | 7.5 ± 0.1       | 2.5        | 213 ± 93      | 276 ± 64        | 1.3  | ≤3            | ≤3             | 1.0      | 4.2 ± 1.2   | 8.1 ± 1.6     | 1.9  | ≤3            | 5.8 ± 0.9       | 1.9  |
| 18-HEPE            | 16 ± 14        | 15 ± 8.5        | 0.9        | 398 ± 145     | 353 ± 127       | 0.9  | 28 ± 7.8      | 25 ± 2.5       | 0.9      | 2.8 ± 0.3   | 12 ± 2.4      | 4.1  | 7.7 ± 3.6     | 31 ± 3.6        | 4.0  |
| AA                 | 120336 ± 39852 | 228433 ± 121856 | 1.9        | 88925 ± 16252 | 847855 ± 457842 | 9.5  | 34924 ± 14133 | 128062 ± 61946 | 3.7      | 5920 ± 1107 | 68837 ± 19180 | 11.6 | 46554 ± 15760 | 306068 ± 181650 | 6.6  |
| EPA                | 72283 ± 38292  | 152781 ± 68461  | 2.1        | 21226 ± 3279  | 138723 ± 58492  | 6.5  | 30005 ± 23728 | 40336 ± 14753  | 1.3      | 2410 ± 1392 | 57642 ± 8676  | 23.9 | 43817 ± 29806 | 140321 ± 66332  | 3.2  |
| DHA                | 21768 ± 9816   | 45620 ± 15458   | 2.1        | 88455 ± 2130  | 287836 ± 88630  | 3.3  | 10988 ± 4895  | 14919 ± 2133   | 1.4      | 4519 ± 1135 | 42512 ± 1575  | 9.4  | 15821 ± 3970  | 32981 ± 10402   | 2.1  |

**Table S7.** Effects of AKBA on LM formation in LOX-transfected HEK 293 cells. 10<sup>6</sup> HEK293 cells stably transfected with human recombinant LOXs (as indicated) were incubated with vehicle (0.1% DMSO) or AKBA (25 μM) for 180 min in PG buffer plus 1 mM Ca<sup>2+</sup>. Cell supernatant was subjected to SPE and UPLC-MS/MS analysis. LM formation is shown as pg/10<sup>6</sup> cells, given as mean ± S.E.M., and as a heatmap representing the –fold increase, for n = 3 independent experiments.

|                    | <b>15-LOX1 wt</b> |             | <b>15-LOX-1 R98A</b> |      |            |     |
|--------------------|-------------------|-------------|----------------------|------|------------|-----|
|                    | veh               | AKBA        | veh                  | AKBA | 0          | 1 2 |
| 17-HDHA            | 16 ± 9            | 372 ± 161   | 17 ± 10              | 1.1  | 58 ± 12    | 0.2 |
| 15-HEPE            | 266 ± 102         | 6748 ± 1167 | 171 ± 49             | 0.6  | 1162 ± 161 | 0.2 |
| 15-HETE            | 259 ± 55          | 2255 ± 280  | 252 ± 68             | 1.0  | 1026 ± 184 | 0.5 |
| 14-HDHA            | 13 ± 8.3          | 214 ± 81    | 11 ± 5.7             | 0.8  | 45 ± 7.2   | 0.2 |
| 12-HEPE            | 126 ± 27          | 2056 ± 324  | 119 ± 33             | 0.9  | 544 ± 86   | 0.3 |
| 12-HETE            | 58 ± 6.0          | 478 ± 44    | 61 ± 17              | 1.1  | 250 ± 40   | 0.5 |
| 7-HDHA             | 12 ± 4.1          | 42 ± 18     | 11 ± 5.4             | 1.0  | 17 ± 3.8   | 0.4 |
| 4-HDHA             | 14 ± 7.4          | 23 ± 1.8    | 14 ± 8.4             | 1.0  | 27 ± 1.3   | 1.2 |
| 18-HEPE            | 590 ± 126         | 1882 ± 213  | 666 ± 209            | 1.1  | 2050 ± 373 | 1.1 |
| 5-HEPE             | 314 ± 64          | 1470 ± 230  | 372 ± 139            | 1.2  | 1661 ± 375 | 1.1 |
| 5-HETE             | 215 ± 96          | 485 ± 84    | 129 ± 37             | 0.6  | 538 ± 120  | 1.1 |
| t-LTB <sub>4</sub> | 3.5 ± 0.6         | 5.9 ± 1.3   | 4.3 ± 0.8            | 1.2  | 4.9 ± 0.9  | 0.8 |
| LTB <sub>4</sub>   | 5.3 ± 0.2         | 10 ± 1.3    | 6 ± 0.8              | 1.2  | 9.0 ± 1.5  | 0.9 |
| PGD <sub>2</sub>   | 10 ± 0.7          | 11 ± 2.0    | 12 ± 3.0             | 1.2  | 10 ± 1.5   | 0.9 |
| PGE <sub>2</sub>   | 33 ± 15           | 31 ± 2.8    | 37 ± 15              | 1.1  | 24 ± 3.1   | 0.8 |
| PD1                | 19 ± 7            | 36 ± 16     | 16 ± 4.6             | 0.9  | 32 ± 15    | 0.9 |
| PDX                | 34 ± 22           | 8.7 ± 1.5   | 33 ± 21              | 1.0  | 7.4 ± 2.8  | 0.8 |
| RvD5               | 3.8 ± 1.3         | 13 ± 6.8    | ≤3                   | 0.8  | ≤3         | 0.2 |
| MaR1               | 14 ± 3.1          | 25 ± 3.7    | 28 ± 16              | 2.0  | 16 ± 3.6   | 0.6 |
| 5,15-diHETE        | 27 ± 7.8          | 22 ± 4.4    | 34 ± 11              | 1.3  | 18 ± 6.5   | 0.8 |

**Table S8.** Effects of AKBA on mutated 15-LOX-1 (R98A) in stable transfected HEK 293 cells. 10<sup>6</sup> stable transfected HEK293 cells (wt- or R98A mutant, as indicated) were incubated with vehicle (0.1% DMSO) or AKBA (10 μM) for 180 min in PG buffer plus 1 mM Ca<sup>2+</sup>. Cell supernatant was subjected to SPE and UPLC-MS/MS analysis. LM formation is given as mean ± S.E.M. in pg/ 10<sup>6</sup> cells; n = 3 independent experiments. Data are shown as pg/10<sup>6</sup> cells and as a heatmap representing the –fold change of vehicle- or AKBA-treated cells versus cells expressing R98A mutant-15-LOX-1 or wt-15-LOX-1, respectively.
